## A scalable method for identifying recombinants from unaligned sequences

Qian Feng<sup>1</sup>, Kathryn Tiedje<sup>2,3</sup>, Shazia Ruybal-Pesántez<sup>3,4,5,6</sup>, Gerry Tonkin-Hill<sup>3,7,8</sup>, Michael Duffy<sup>2,3</sup>, Karen Day<sup>2,3</sup>, Heejung Shim<sup>1</sup>, Yao-ban Chan<sup>1,\*</sup>

**1** Melbourne Integrative Genomics / School of Mathematics and Statistics, The University of Melbourne, Melbourne, Australia

**2** Department of Microbiology and Immunology, The University of Melbourne, Bio21 Institute, Melbourne, Australia

**3** School of BioSciences, The University of Melbourne, Bio21 Institute, Melbourne, Australia

**4** Population Health and Immunity Division, Walter and Eliza Hall Institute of Medical Research, Melbourne, Australia

**5** Department of Medical Biology, The University of Melbourne, Melbourne, Australia

**6** Burnet Institute, Australia

**7** Bioinformatics Division, Walter and Eliza Hall Institute of Medical Research, Melbourne, Australia

**8** Parasites and Microbes, Wellcome Sanger Institute, Wellcome Genome Campus, Hinxton, United Kingdom

\* yaoban@unimelb.edu.au (YBC)

## Abstract

Recombination is a fundamental process in molecular evolution, and the identification of recombinant sequences is of major interest for biologists. However, current methods for detecting recombinants only work for aligned sequences, often require a reference panel, and do not scale well to large datasets. Thus they are not suitable for the analyses of highly diverse genes, such as the *var* genes of the malaria parasite *Plasmodium falciparum*, which are known to diversify primarily through recombination.

We introduce an algorithm to detect recombinant sequences from an unaligned dataset. Our approach can effectively handle thousands of sequences without the need of an alignment or a reference panel, offering a general tool suitable for the analysis of many different types of sequences. We demonstrate the effectiveness of our algorithm through extensive numerical simulations; in particular, it maintains its accuracy in the presence of insertions and deletions.

We apply our algorithm to a dataset of 17,335 DBL $\alpha$  types in *var* genes from Ghana, enabling the comparison between recombinant and non-recombinant types for the first time. We observe that sequences belonging to the same ups type or DBL $\alpha$  subclass recombine amongst themselves more frequently, and that non-recombinant DBL $\alpha$  types are more conserved than recombinant ones.

## Author summary

Recombination is a fundamental process in molecular evolution where two genes exchange genetic material, diversifying the genes. It is important to properly model this process when reconstructing evolutionary history, and to do so we need to be able to identify recombinant genes. In this manuscript, we develop a method for this which can be applied to scenarios where current methods often fail, such as where genes are very diverse.

We specifically focus on detecting recombinants in the *var* genes of the malaria parasite *Plasmodium falciparum*. These genes influence the length and severity of malaria infection, and therefore their study is critical to the treatment and prevention of malaria. They are also highly diverse, primarily because of recombination. Our analysis of genes from a cross-sectional study in Ghana study show fundamental relations between the patterns and prevalence of recombination in these genes and other important biological categorisations.

## Introduction

Recombination, the exchange of genetic materials between two molecular sequences, is a fundamental evolutionary process in viruses, prokaryotes, eukaryotes, and even between kingdoms [1]. The biological mechanisms of recombination, which differ across different species, lead to the creation of novel ‘mosaic’ sequences in which different regions have distinct evolutionary histories [2–4].

In human population genetics, recombination plays a central role in shaping the patterns of linkage disequilibrium, and thus recombination identification is of importance for estimating recombination rates, quantitative trait loci and association studies [5, 6]. Recombination also explains a considerable amount of the genetic diversity of human pathogens [7–9], such as malaria [10] or protozoan parasites [11, 12]. It plays a central role for parasites to escape from host immune pressures, or adapt to the effects of antiparasitic drugs. Therefore, the characterisation of recombination events is critical to the clinical treatment and prevention of such diseases.

In phylogenetics, recombination breaks a central assumption, that evolution is tree-like. Not acknowledging recombination can result in severely misleading inferred phylogenies, e.g., the overestimation or underestimation of branch lengths [13–15]. This can be mitigated by the application of phylogenetic network reconstruction methods [16]; however, these methods are still in their infancy. An accurate identification of recombinant sequences would benefit these methods.

Many methods have been developed for identifying recombination events and/or recombinants [3, 5, 17–20]. They can be roughly characterised into four paradigms:

1. Distance-based methods [1, 21–24] look for inversions of distance patterns among the sequences. They usually employ a sliding-window approach to estimate distances and are generally computationally efficient.
2. Phylogenetic methods [8, 25–30] look for discordant topologies in adjacent sequence segments, which is taken as a sign of recombination.
3. Compatibility methods [2] test for phylogenetic incongruence on a site-by-site basis. This type of method can be biased by many closely related sequences.
4. Substitution distribution-based methods [31–34] use a test statistic to examine the

adjacent sequence segments. 31

Nearly all available methods require a multiple sequence alignment, which is commonly 32  
available for population genetic datasets which have relatively low intra-population diversity. 33  
Likewise, many methods (e.g., [21, 23, 29, 30, 35]) require a reference panel of known 34  
non-recombinant sequences, which potential recombinants can be compared against. In the 35  
absence of both an alignment and a reference panel, the available methods for detecting 36  
recombinants are limited. Finally, most of the available methods do not scale well to very large 37  
datasets. 38

We focus on the specific application of detecting recombinants in the *var* genes of the 39  
malaria parasite *Plasmodium falciparum*. These genes express the *Plasmodium falciparum* 40  
erythrocyte membrane protein 1 (PfEMP1), which is the main target of the human immune 41  
response to the blood stages of infection. PfEMP1 is expressed on the surface of infected red 42  
blood cells and serves to bind host endothelial receptors [36]. It is therefore crucial for the 43  
successful proliferation and transmission [37, 38] of *P. falciparum*. The *var* genes are a large 44  
gene family (up to 60 copies per genome) [39], and high levels of diversity in the *var* genes have 45  
been observed in a single parasite genome, as well as small local populations [40–44]. This 46  
diversity is driven primarily by recombination [10], and so an accurate identification of *var* 47  
recombinants is critical to understanding the evolution of the system. 48

Briefly, the study of *var* genes has revealed a strong domain structure, including multiple 49  
Duffy-binding like domains (DBL $\alpha$ ,  $\beta$ ,  $\delta$ ,  $\epsilon$ ,  $\gamma$ , and  $\kappa$ ) and cysteine-rich interdomain regions 50  
(CIDR $\alpha$ ,  $\beta$ ,  $\gamma$ ) [45]. The structure of the gene itself is highly variable in both the number and the 51  
composition of these domains. Population genetic studies of *var* genes have focused on 52  
sequencing the DBL $\alpha$  domain, which almost always appears exactly once in a *var* gene. This 53  
domain has been found to be immunogenic [46] and is crucial to understanding acquired 54  
immunity and potential for vaccination [47]. Unfortunately, the DBL $\alpha$  domain is highly 55  
variable, with many thousands of disparate sequences identified. This prevents the construction 56  
of a reliable multiple sequence alignment, let alone a phylogenetic tree, and so little is known 57  
about their evolutionary history. 58

Recent evidence [4, 47, 48] suggests that recombination is uniformly distributed throughout 59  
the DBL $\alpha$  domain. The first systematic attempt to map out recombination in this domain was 60  
performed by Zilversmit *et al.* [4], who developed a method based on a jumping hidden Markov 61

model (JHMM) to align a sequence to its nearest relations in a reference dataset, allowing jumps 62  
between sequences which represent recombination events. They used this method to “paint” 63  
each sequence according its nearest relations. This was further exploited by Tonkin-Hill *et* 64  
*al.* [48], who studied a large dataset of *var* genes around the world. They found a strong 65  
geographic population structure among the genes coming from different countries. 66

Although these works were valuable in uncovering the recombination structure of *var* genes, 67  
there is still much work to be done. The method of Zilversmit *et al.* does not identify 68  
recombinant sequences, only recombination events; by identifying the sequences themselves, we 69  
can investigate the differences between the recombinants and non-recombinants, and thus 70  
determine the effect of recombination on the structure and function of the gene. However, the 71  
diversity of the sequences and lack of an alignment and reference panel make it difficult to apply 72  
current methods for this task. 73

In this paper, we develop a new method to identify recombinants in a large dataset of 74  
unaligned sequences. This method exploits the information produced by the JHMM method, 75  
combining it with a distance-based comparison to identify recombinants. We have applied this 76  
method to a large dataset of DBL $\alpha$  sequences, producing several new biological results 77  
concerning the patterns of recombination in this domain. Extensive simulations also confirm the 78  
accuracy and applicability of our method. 79

## Methods 80

We propose a novel method to detect recombinant sequences in a set of unaligned protein or 81  
DNA sequences. This method is specifically designed to handle sequences for which it is 82  
difficult to construct a multiple sequence alignment. It takes as input a set of homologous 83  
sequences, and outputs the sequences that are identified as recombinant, their putative parents, 84  
and the corresponding breakpoints. Note that extant sequences are identified as the ‘parents’ of 85  
the recombinant; more accurately, we identify the descendants of the ancestral sequences which 86  
were the parents of the recombination. 87

Our method combines several previous methods (the JHMM method of [4] and the MAFFT 88  
algorithm of [49]) with a novel distance-based approach to identify recombinant sequences. The 89  
method consists of the following steps; see Fig 1 for a graphical overview. 90

1. We apply the JHMM method of Zilversmit *et al.* [4] to represent each sequence as a 91

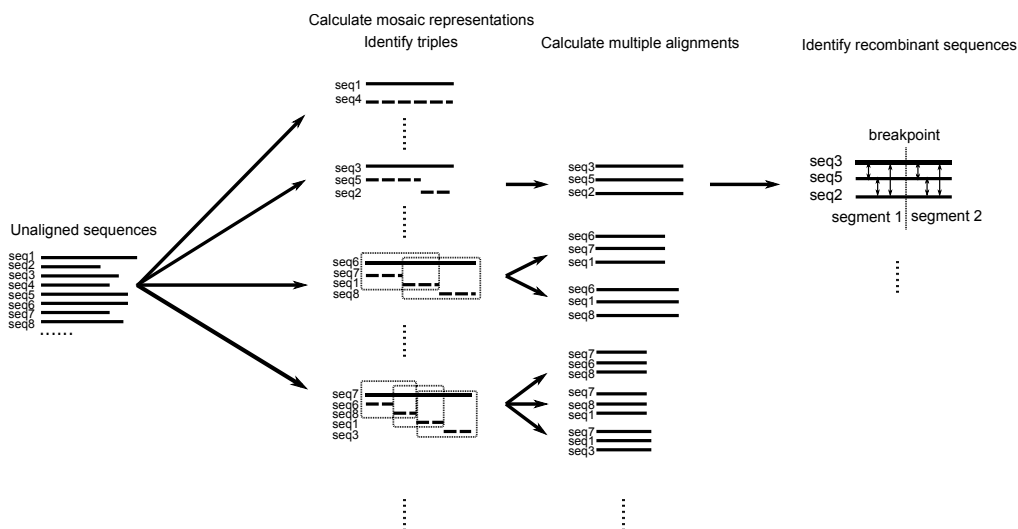

**Fig 1. A schematic of the algorithm.** From an input set of unaligned sequences, we first use the JHMM method to represent each sequence as a mosaic of other sequences. Next, we identify triples of segments, consisting of a recombinant segment and its two parents, and complete their alignment with the MAFFT algorithm. Finally, we identify the recombinant in each triple using a distance-based approach.

‘mosaic’ of segments from other sequences in the dataset. 92

2. From the mosaic representations, we identify triples of segments which contain a recombinant segment and its two parents. The mosaic representations provide pairwise alignments for each of these triples, which we then complete to three-way alignments with the MAFFT algorithm [49]. 93 94 95 96

3. Using a distance-based approach, we identify the recombinant sequence in each triple. 97

We discuss each step in detail in the following sections. 98

## Calculating mosaic representations 99

In this step, we use the jumping hidden Markov model of Zilversmit *et al.* [4] to express each sequence as a ‘mosaic’ combination of the other sequences in the dataset. This model was designed to uncover the patterns of recombination in a set of unaligned sequences. 100 101 102

In this model, each character in a ‘target’ sequence is considered to be a copy from a character in a sequence in a reference set (‘source’ sequences). The hidden state of the Markov model is the (position of the) character which is copied. The copy may be imperfect, representing mutation. After a character is copied, the next character in the target sequence is 103 104 105 106

usually copied from the next character in the same source sequence. However, with small probabilities:

- the source character may switch to any character in any position in another sequence, representing recombination;
- the model switches to an ‘insertion’ state, where the target character is chosen randomly and the source character does not move;
- the model switches to a ‘deletion’ state, where the source character moves forward without being copied.

If the model is in an insertion or deletion state, it continues in this state until (with a small probability per character) we return to copying characters from the current source sequence.

We note that this model is descended from the seminal HMM of Li and Stephens [6], which has seen wide usage in many different applications involving recombining sequences. This model is largely similar, but only works on aligned sequences, and recombination can only switch between characters in the same position in the alignment. This restriction results in a more efficient model with fewer hidden states, but one which cannot be used for unaligned sequences.

We use the Zilversmit *et al.* model here by taking each sequence in our dataset in turn as the target sequence and using every other sequence in our dataset as the source sequences. We first estimate the parameters of the model, following Tonkin-Hill *et al.* [48]. The parameters are the probability of gap initiation  $\delta$ , the probability of gap extension  $\epsilon$ , and the probability of recombination  $\rho$ . We first set  $\rho$  to zero, and compute maximum likelihood estimates for  $\delta$  and  $\epsilon$  with the Baum-Welch algorithm (see [50]). We then calculate the composite likelihood of all sequences for all values of  $\rho$  over the interval  $[0, 0.1]$  under the estimated  $\hat{\delta}$  and  $\hat{\epsilon}$ , and choose the value of  $\rho$  which maximises this likelihood as our estimate  $\hat{\rho}$ .

Finally, we calculate the Viterbi path for each target sequence to find the most probable sequence of hidden states (copied characters, insertions, and deletions). The result is a ‘mosaic’ alignment for each sequence to a series of segments from the other sequences in the dataset. An example of this can be seen in [4, Figure 2A].

For large-scale datasets, training the JHMM model is a significant bottleneck for our method. We again follow [48], and use the Viterbi training algorithm [51] in place of the Baum-Welch to

estimate  $\delta$  and  $\varepsilon$ , and calculate the composite likelihood over 1000 randomly selected sequences 137  
to estimate  $\rho$ . This allows us to analyse large datasets (such as the DBL $\alpha$  dataset in Section 138  
“Analysis of DBL $\alpha$  sequences from a cross-sectional study in Ghana”) in a practical timeframe 139  
with only a small loss in accuracy. 140

## Identifying recombinant triples and calculating multiple sequence 141 alignments 142

For each sequence, the JHMM method produces an alignment of that sequence to segments from 143  
the other sequences. Whenever the source segment changes, we consider this to represent a 144  
recombination event at that breakpoint. It is not necessarily the case (see below) that the target 145  
sequence in this case is the recombinant sequence, and the two source segments come from the 146  
parents of the recombination. However, we do know that the target sequence and the two source 147  
sequences form a ‘recombinant triple’, that is, are the two parents and the child of a 148  
recombination. 149

Therefore, for each breakpoint in each sequence, we identify the triple of the target sequence 150  
and the two sequences which contain the source segments before and after the breakpoint as a 151  
recombinant triple. We do this for all target sequences, resulting in a list of recombinant triples, 152  
some of which may refer to the same recombination event. Sequences which do not infer a 153  
breakpoint do not generate any triples. 154

We will apply a distance-based method to these triples to identify the true recombinant 155  
sequence for each one. To calculate distances, we require a multiple alignment of the segments 156  
from these three sequences. However, the JHMM method only provides a pairwise alignment of 157  
each target segment to one source segment. We take these pairwise alignments and add the 158  
corresponding segment from the remaining source sequence in the triple, using the MAFFT 159  
algorithm [49]. For each triple, this results in a multiple alignment of the segments surrounding 160  
the breakpoint. See Fig 2 for an overview of this process. 161

Note that we require a sufficient sequence length on either side of the breakpoint in order to 162  
calculate distances accurately. Moreover, we observe in practice that short source segments 163  
resulting from the JHMM method tend to be artifacts of the method, rather than representing 164  
multiple consecutive recombinations (see S1 Fig). To address this, we exclude triples for which 165  
the aligned segment on either side of the breakpoint is less than 10AA, which we found to be a 166



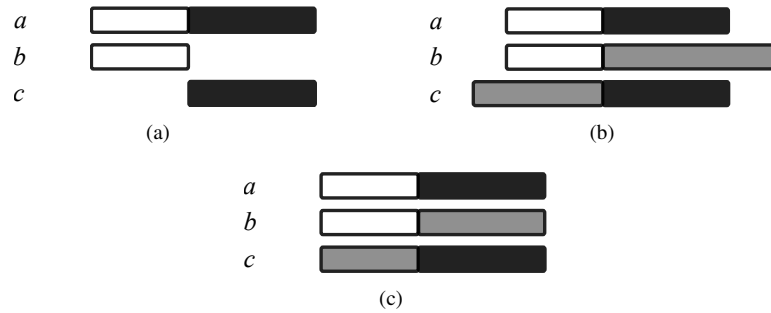

**Fig 2. An example of calculating a multiple sequence alignment with MAFFT.** (a): A segmental pairwise alignment generated by the JHMM method. Segments from sequence *a* are aligned to segments from sequences *b* and *c* respectively. (b): Using MAFFT, we include the corresponding segment from the third sequence into the pairwise alignment on either side of the breakpoint. (c): By trimming the alignments, we generate a multiple alignment.

suitable threshold in practice.

167

## Identifying recombinant sequences

168

### Identifiability: a phylogenetic perspective

169

The main novelty in our method is the ability to identify which member of a triple is the true recombinant. It is important to note that the JHMM method does *not* identify the recombinant, but instead finds the (segments of) extant sequences which are the most closely related to the target sequence.

170

171

172

173

This can be illuminated by considering an explicit phylogenetic network [16] with three aligned sequences and one recombination as an example, as shown in Fig 3. Here, we can translate a phylogenetic network to the corresponding mosaic representations, assuming the JHMM method estimates the distances between sequences perfectly. It can be seen that the same mosaic structure can result from networks with different recombinants.

174

175

176

177

178

In fact, as discussed at length in [52], this is an unavoidable problem with the identifiability of phylogenetic networks; networks cannot be distinguished solely by the topologies of displayed trees, which the output of the JHMM method is dependent on. The solution, as given in [52], is to use (inferred) branch lengths to distinguish between the networks, and thereby identify the recombinant.

179

180

181

182

183

When the phylogenetic network only consists of three sequences and one recombination (as in Fig 3), it is easy to translate the network to the JHMM output, and thus use it to find the recombinant. However, the problem rapidly becomes much more complicated with more

184

185

186

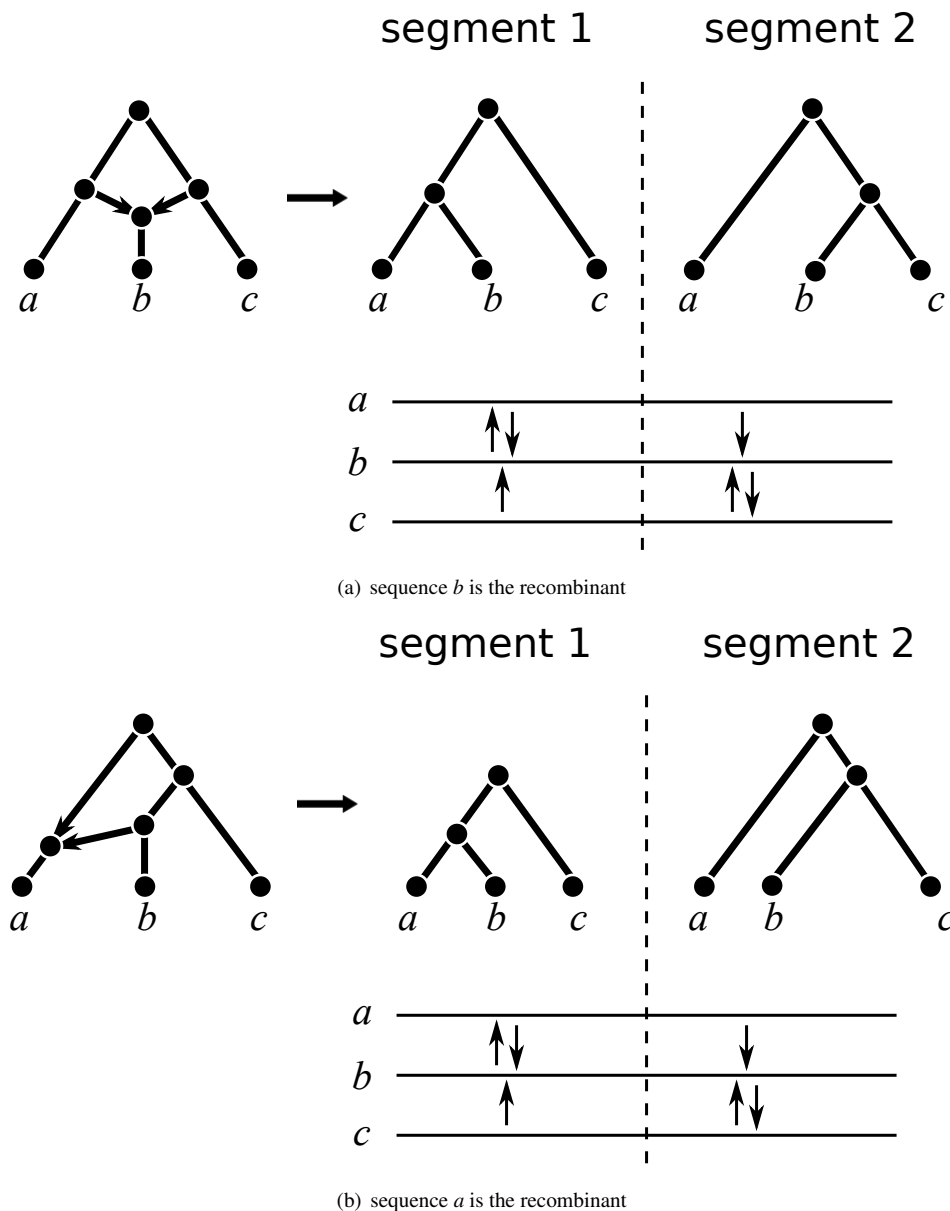

**Fig 3. Identifiability of networks from the JHMM output.** Here, two networks with different recombinants produce the same profile tree topologies, and thus the same JHMM output. The JHMM output is depicted below the profile trees, with arrows from each target segment pointing to the matching source segment (so, for example, if *b* is the target sequence, it is matched to source sequence *a* in segment 1 and *c* in segment 2 in both cases). Both cases produce identical JHMM output: in particular, sequence *b* is matched to two different source sequences even though it is not necessarily the recombinant.

sequences and/or recombinations, and indeed for ancestral recombinations (predating a

187

divergence) it's not even clear how to define an extant 'true recombinant'. To avoid this problem,

188

we only identify triples of sequences as in Section "Identifying recombinant triples and

189

calculating multiple sequence alignments", and assume that only one recombination occurs in

190

the recent evolutionary history of each triple. For large datasets, we are essentially assuming that recombination events are ‘sufficiently far apart’ either in the network or in the genome that they do not interact with each other.

From a phylogenetic perspective, we can see that when this assumption holds, identifying only triples breaks down a complicated network into repeated cases of a three sequence–one recombination network, for which we can identify the recombinant. See Fig 4 for an example of this.

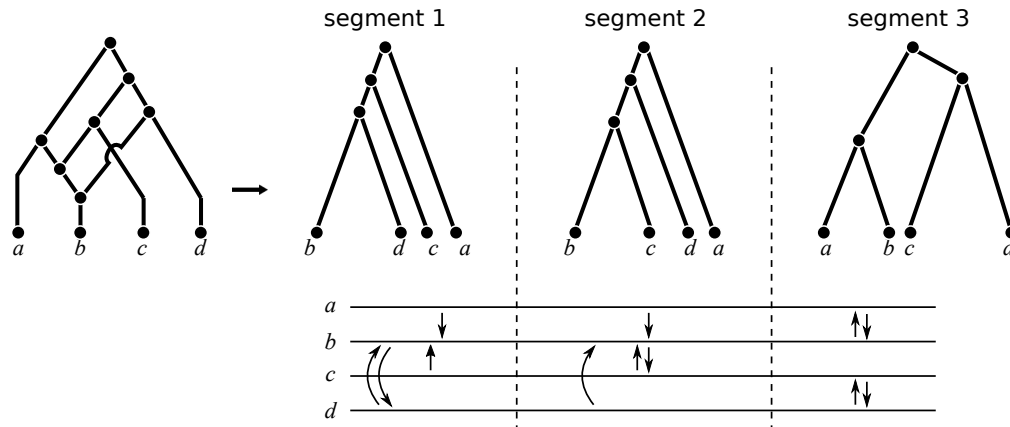

**Fig 4. Decomposing a network into triples.** At the first breakpoint, the triple  $\{b, c, d\}$  is identified from target sequence  $b$ , while at the second breakpoint,  $\{a, b, c\}$  is identified from sequence  $b$ , and  $\{b, c, d\}$  from sequences  $c$  and  $d$ . In all cases, distance-based recombinant identification will obtain the correct recombinant ( $b$  at both breakpoints).

### Distance-based recombinant identification

Our algorithm is based on the well-known principle [1, 17, 32, 53] that two non-recombinant sequences will have a similar evolutionary distance all along the sequence; that is, the distance between the two sequences does not change before and after a recombination breakpoint in a third sequence. Conversely, the distance between a recombinant sequence and another sequence does change at a breakpoint. Using a distance-based method here allows us to avoid an expensive tree or network inference step and thus scale our method to many sequences.

We thus calculate, for each recombinant triple  $\{a, b, c\}$ , the evolutionary distance between each pair of segments before and after the breakpoint. We use here the BLOSUM62 distance [54, 55] for amino acids and Hamming (mismatch) distance for DNA sequences (these could in principle be substituted by a large variety of ways to calculate evolutionary distance). We denote these distances by  $D_1$  and  $D_2$  for the first (pre-breakpoint) and second

(post-breakpoint) segment respectively. 210

We then compare the distances for each pair of sequences in the triple before and after the 211  
breakpoint; the pair with the smallest absolute difference in distance are inferred to be the two 212  
non-recombinant sequences, while the third is inferred to be recombinant. Formally, we have 213

$$\text{recombinant} = \{a, b, c\} \setminus \underset{\{x, y\} \subset \{a, b, c\}}{\operatorname{argmin}} |D_1(x, y) - D_2(x, y)|.$$

This method identifies one recombinant from each recombinant triple; note that one 214  
recombination may generate one or more triples, but the identified recombinant from each of 215  
these triples should be the same. We apply this to all triples identified above, generating a list of 216  
recombinants in the entire dataset and their putative parents. 217

## Calculating support values 218

In addition to identifying recombinant sequences, we can also measure the uncertainty in our 219  
identification by using bootstrapping. Bootstrapping in phylogenetics is a standard statistical 220  
tool [56], widely used to assign uncertainties to branches on a phylogenetic tree. We use the 221  
same basic idea here. 222

For each multiple alignment of a triple, we resample characters in the alignment (columns) 223  
within each segment, with replacement. This provides us with a resampled alignment, and we 224  
generate 100 replicates per triple. We then run our distance-based method to identify the 225  
recombinant for each replicate. The proportion of replicates which infer the same recombinant 226  
as the original alignment is the support value of this detection. The larger the support value, the 227  
more certain we are of the detection. 228

**Efficiency** The complexity of the method is dominated by the first step of estimating the 229  
parameters via the Baum-Welch algorithm. As shown in [4], each iteration of the algorithm is 230  
 $O(n^2l^2)$  in time and memory, where  $n$  is the number of sequences and  $l$  the length of each 231  
sequence. The number of iterations required is not constant, but is generally small (less than 10). 232

## Results

233

### Analysis of DBL $\alpha$ sequences from a cross-sectional study in Ghana

234

**Dataset** We applied our method to detect recombinants and breakpoints in a dataset of DBL $\alpha$  sequences collected from individuals with microscopically confirmed *P. falciparum* infections (*isolates*) living in the Bongo District, in the Upper East region of Ghana (GenBank BioProject Number: PRJNA396962) [57,58]. Details on the study population, data collection procedures, and epidemiology have been published elsewhere [59–61]. This dataset consists of 35,591 previously published DBL $\alpha$  sequences collected from 161 isolates.

235

236

237

238

239

240

**Preprocessing** We follow the standard pipeline used in [43,48]. The DNA sequences were first translated into protein sequences, and removed if the resulting sequence contained a stop codon. The protein sequences were then clustered with the Usearch software (v8.1.1861) [62] with a 96% sequence similarity cutoff. The cluster centroids were then taken as a representative sequence for the clusters, which are known as DBL $\alpha$  *types*. This results in a dataset of 17,335 types, each of which may appear in several isolates.

241

242

243

244

245

246

**Identifying recombinants** We applied our method to this dataset to detect recombinant types. We detected 14,801 (85.4%) of the DBL $\alpha$  types to be recombinant.

247

248

The analysis was run on a high performance cluster at the University of Melbourne (72 Intel(R) Xeon(R) Gold 6254 CPU cores @ 3.10GHz, 768GB RAM). For estimating parameters, we split the data into 578 subsets of 30 sequences each at every iteration of the Viterbi training algorithm, which were executed in parallel. This was also done for estimating Viterbi paths and identifying recombinants. The time and memory usage is summarised in Table 1. By far the largest bottleneck is the computation of the mosaic representations of the sequences (both parameter estimation and computation of the Viterbi paths); once this was completed, the remaining steps are very efficient even for a dataset of this size.

249

250

251

252

253

254

255

256

**Table 1. Time and memory consumption per subset (30 sequences).**

|                | Parameter estimation | Viterbi paths | Recombinant identification |
|----------------|----------------------|---------------|----------------------------|
| Time (minutes) | 644.8                | 294.9         | 2.7                        |
| Memory (GB)    | 21.3                 | 21.2          | 0.1                        |

## DBL $\alpha$ sequences from the same ups type recombine more frequently

The upstream promoter sequences of each *var* gene can be classified into three main ups types, upsA, upsB, and upsC [41]. These ups types (not to be confused with DBL $\alpha$  types; instead, they are analogous to DBL $\alpha$  subclasses) are associated with disease severity and clinical significance [63], and thus it is crucial to investigate the behaviour of recombinants and recombinations within and between ups types.

Earlier studies on a much smaller dataset [64], based on sequence similarity, proposed that *var* gene recombination preferentially occurs within the same ups type. Using our method, which to our knowledge is the first systematic attempt to detect recombinants in *var* genes in natural parasite populations, we found considerable evidence supporting this hypothesis. Our results are summarised in Table 2.

**Table 2. Proportions of recombinations from the same ups types.** Theoretically expected proportions, based on the base frequencies of the ups types, are given in brackets. All *p*-values are highly significant ( $< 2.2 \times 10^{-16}$ ).

|                 | Parent-child  | Parents       | Family        |
|-----------------|---------------|---------------|---------------|
| UpsA vs. upsB/C | 99.7% (85.0%) | 98.9% (85.0%) | 98.5% (77.6%) |
| UpsA, B and C   | 85.3% (50.9%) | 65.5% (50.9%) | 51.1% (30.5%) |

Following the method of [41], we classified each DBL $\alpha$  type into one of 32 subclasses. The subclasses were then classified into either upsA or upsB/C types (the latter two being difficult to distinguish based on subclasses alone). For greater precision, we also developed a method to distinguish between all three types: we used BLASTP [65] to match each sequence to the closest reference sequence in [41], and then classified that sequence to the ups type of the closest reference sequence.

Having identified recombinant sequences and their putative parents, we then calculated the proportion of recombination triplets which have one parent and the child, both parents, and both parents and the child belonging to the same ups type ('Parent-child', 'Parents', and 'Family' in Table 2). In all cases, we found that the parents and/or the child of a recombination were significantly more likely ( $p < 2.2 \times 10^{-16}$  from  $\chi^2$  tests) to belong to the same ups type. This effect was most strongly noticeable when we divided the sequences only into ups A and B/C types; for example, the two parents and the child were in the same type 98.5% of the time, compared to a theoretical expectation of 77.6%. Similar conclusions were reached when we divided the sequences into three types. Our results strongly reinforce the conclusions of earlier studies, and provide more precision with the division into three ups types.

We also considered the proportions of identified recombinants in each ups type. We found that there was a significant difference in the proportions of recombinants in the three types ( $p = 2.193 \times 10^{-7}$  from a  $\chi^2$  test), with upsA having the least proportion of recombinants, and upsC the most (82.3%, 84.9%, and 87.6% from A, B, and C respectively).

### Proportions of recombination differ among DBL $\alpha$ subclasses

DBL $\alpha$  sequences can be classified according to sequence similarity into 33 subclasses (DBL $\alpha$ 0.1–24, DBL $\alpha$ 1.1–8, DBL $\alpha$ 2). These subclasses are strongly associated with ups types; however, they also provide greater resolution in dividing the sequences. We thus repeated our earlier analyses with regards to the subclasses.

As with ups type, we found a significant (all  $p < 2.2 \times 10^{-16}$ ) increase in recombinations with one parent and the child (58.8% vs. 7.9% expected), parents (31.0% vs. 7.9% expected), and both parents and the child (20.6% vs. 1.0% expected) from the same subclass.

We next considered the proportions of identified recombinants in each subclass (Fig 5). We identified seven subclasses (DBL $\alpha$ 0.1, 5 and 11 were too high, while DBL $\alpha$ 0.3, 8, 9 and 23 were too low) which were significantly different from the average under a Bonferroni correction for multiple testing. Of particular note is the DBL $\alpha$ 0.1 subclass, which has been noted to involve more recombinations than other subclasses [10]. We suggest that these subclasses should be explored further to determine if there are some biological factors that may explain these results.

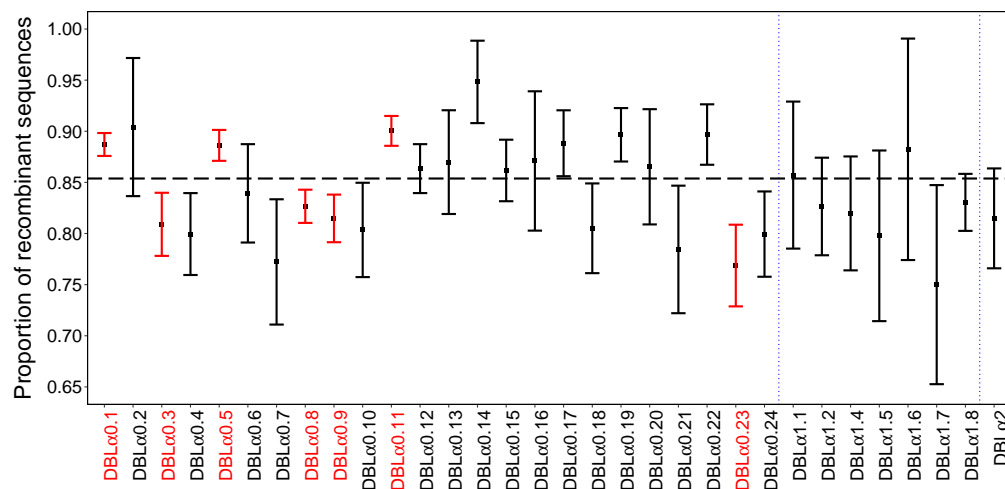

**Fig 5. Proportions (and 95% confidence intervals) of recombinants for each DBL $\alpha$  subclass.** Subclasses which are significantly different from the overall average are highlighted in red. The horizontal dashed line displays the overall proportion of recombinant sequences in the entire dataset.

We also investigated the proportion of recombinants among individual isolates, and among the two broad catchment areas in the Bongo District (Soe and Vea/Gowrie) that the isolates were collected from. We did not detect any significant differences here, see S1 File and S2 Fig for more details.

### **Non-recombinant DBL $\alpha$ types are more conserved than recombinant types**

It is well known [43, 66] that some DBL $\alpha$  types are highly conserved, i.e., that they appear in many different isolates. On the other hand, many other types only appear rarely (or even once, in our large dataset). We hypothesise that non-recombinant types are more “stable” than recombinants, and thus may be more highly conserved.

We investigated this hypothesis via the recombinants identified by our method. Firstly, we compared the observed frequencies of the recombinants to the non-recombinants; we found that non-recombinants occurred significantly more often in the dataset (average 4.2 vs. 3.7,  $p = 0.021$  from a Wilcoxon rank sum test).

We also considered if there is a difference in the proportions of frequent DBL $\alpha$  types in recombinants and non-recombinants. As the frequencies of types are highly right-skewed (see S3 Fig), thus, we thresholded the frequencies at various levels to determine if there were particular frequencies where an effect could be noticed. The results are in Table 3. We found that for a threshold frequency of 5, there were significantly fewer frequent recombinants than non-recombinants; however, this effect becomes less noticeable for larger thresholds. This suggests that there is a high proportion of recombinants which appear very few times in the dataset; these are potentially relatively recent recombinants, which may have not been fixed in the population.

**Table 3. Proportions of frequent (larger than the threshold) recombinant and non-recombinant DBL $\alpha$  types for different thresholds.**

| <b>Threshold</b>            | <b>5</b> | <b>10</b> | <b>15</b> | <b>20</b> |
|-----------------------------|----------|-----------|-----------|-----------|
| Recombinants                | 17.5%    | 4.5%      | 2.1%      | 1.3%      |
| Non-recombinants            | 21.0%    | 6.0%      | 2.3%      | 1.6%      |
| $P$ -value ( $\chi^2$ test) | 0.006    | 0.047     | 0.666     | 0.634     |

### **Breakpoint positions are associated with homology blocks**

It is known that a number of semi-conserved homology blocks (HBs) occur frequently in *var* genes [41]. These HBs recombine at exceedingly high rates [67, 68], and are known to be useful



in predicting disease severity [36]. We thus investigated the patterns of recombination in  $DBL\alpha$  types in relation to these homology blocks.

The positions of recombination breakpoints, as found by the JHMM method, are shown in Fig 6. Of particular note is:

- The recombination rate is not constant throughout the sequence, but displays three distinct peaks spaced in roughly equal intervals. These peaks clearly correspond to the three most frequent homology blocks, HB5, 14, and 36, with the height of the peak also corresponding to the frequency of the HB.
- The frequency of breakpoints drops sharply towards either end of the sequence. This is an artifact of the method and does not imply that the recombination rate is lower there; we cannot recognise a recombination which is close to one end of the sequence.

This reinforces the biological theory that recombination occurs within short identical segments [69].

We also investigated the occurrence of HBs in the recombinant and non-recombinant sequences identified by our algorithm. We discovered that the number of HBs in recombinant sequences were significantly higher than in non-recombinant sequences (5.5 vs. 5.3,  $p < 2.2 \times 10^{-16}$  from Wilcoxon rank sum test). Furthermore, the proportion of sequences containing “important” HBs (5, 14, and 36) were also significantly different between the two groups (83.9% vs. 78.5%,  $p = 1.859 \times 10^{-11}$  from  $\chi^2$  test), indicating that recombinants tend to have more conserved building blocks. Finally, we found that recombinant sequences had higher pairwise HB similarities [36] with each other than non-recombinants (0.629 vs. 0.618,  $p < 2.2 \times 10^{-16}$  from Wilcoxon rank sum test). For more details, see S2 File.

## Simulations

### Simulation design

We conducted extensive simulations to evaluate the effectiveness of our method. Our simulation protocol is as follows:

1. Simulate a tree (genealogy) under the coalescent (without recombination) using `msprime` [70].

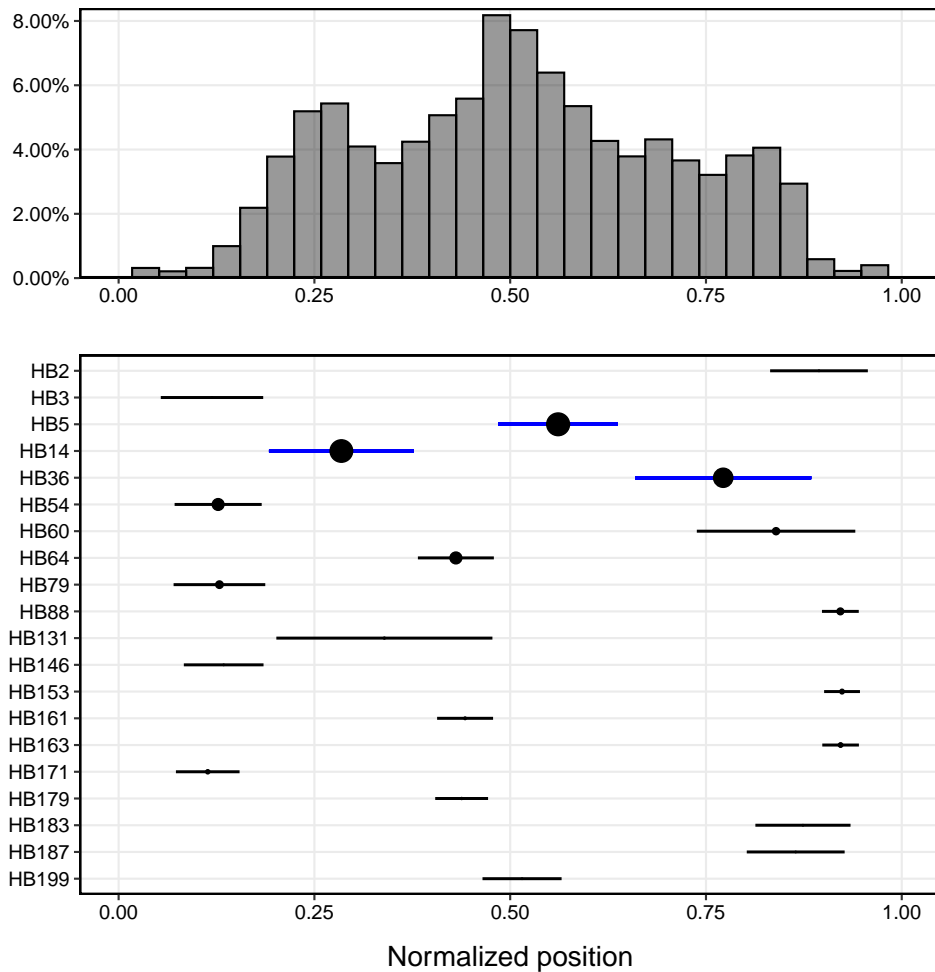

**Fig 6. Positions of recombination breakpoints.** (Top) The histogram of relative breakpoint positions of recombinations. (Bottom) The position of the most common homology blocks, with circle size proportional to frequency. The three most frequent homology blocks (HB5, 14, and 36) are highlighted in blue.

2. Evolve amino acid sequences from a common ancestor along the tree using Pyvolve [71]. 355

If insertions and/or deletions are required, we use INDELible [72] instead. 356

3. Generate recombinant sequences from two or more randomly chosen sequences in the 357

dataset, with breakpoints chosen uniformly at random along the genome. The parent 358

sequences are removed from the dataset. 359

Note that we do not evolve our sequences further after the recombination step; however, 360

since we remove the parents from the dataset, this is indistinguishable from having earlier 361

recombinations in sequences that do not diverge. 362

In our simulations, we simulate both equal-length sequences (no indels, see Table 4), and 363

unequal-length sequences with indel events (see Table 5), generating unaligned input.

364

**Table 4. General simulation parameters (no indels).** We vary each parameter in turn while holding the others fixed at the default values (in bold).

| Parameter                                                   | Values                                                                |
|-------------------------------------------------------------|-----------------------------------------------------------------------|
| ① Proportion of recombinant sequences (%)                   | 10, 20, 30, 40, <b>50</b> , 60, 70, 80, 90                            |
| ② Average number of recombinations per recombinant sequence | 1.0, 1.1, 1.2, 1.3, 1.4, <b>1.5</b> , 1.6, 1.7, 1.8, 1.9, 2.0         |
| ③ Dataset size (sequences)                                  | 100, 150, <b>200</b> , 250, 300, 350, 400, 450, 500                   |
| ④ Sequence length (AA)                                      | 100, 150, <b>200</b> , 250, 300, 350, 400, 450, 500                   |
| ⑤ Mutation rate (substitutions/site/coallescent unit)       | 0.1, 0.2, 0.3, 0.4, <b>0.5</b> , 0.6, 0.7, 0.8, 0.9, 1.0              |
| ⑥ Amino acid evolution model                                | AB [73], DAYHOFF [74], JTT [75], LG [76], MTMAM [77], <b>WAG</b> [78] |

**Table 5. Indel simulation parameters (default values in bold).** Insertions and deletions are simulated at the same rate, with lengths according to a negative binomial distribution with variance 10.

| Parameter                                                      | Values                          |
|----------------------------------------------------------------|---------------------------------|
| ⑦ Indel rate (expected number of indels/site/coallescent unit) | 0.1, 0.2, <b>0.3</b> , 0.4, 0.5 |
| ⑧ Mean indel size (AA)                                         | 3.7, 5.2, <b>6.0</b> , 6.6, 7.0 |

There are a wide variety of parameters which could potentially affect the performance of the method. Some of these are laid out in Tables 4 and 5. To keep our simulations tractable, we only vary one parameter at a time, keeping the remainder fixed at default values. For each parameter combination, we simulate 100 datasets and run our method on each dataset in turn.

365

366

367

368

To assess the performance of our algorithm, we calculate the *sensitivity* and *specificity* of our method for each dataset. The sensitivity is defined as the proportion of true recombinants that are correctly detected, while the specificity is the proportion of true non-recombinants that are correctly detected.

369

370

371

372

## Results

373

Our results are shown in Figs 7–14. Overall, it can be seen that the method enjoys good performance, with most parameter settings offering both sensitivity and specificity above 70% (and often much higher). We briefly consider the effect of each parameter in turn.

374

375

376

**Recombinant proportion** As the proportion of recombinants increases, sensitivity is stable at around 80%, while specificity decreases (Fig 7). Here, more recombinant sequences result (correctly) in a higher number of recombinations detected. It appears that the proportion of true recombinants extracted from the recombinant triples remains largely the same (constant sensitivity); however, there are proportionally more false detections as the number of

377

378

379

380

381

non-recombinants decreases, resulting in a lower specificity.

382

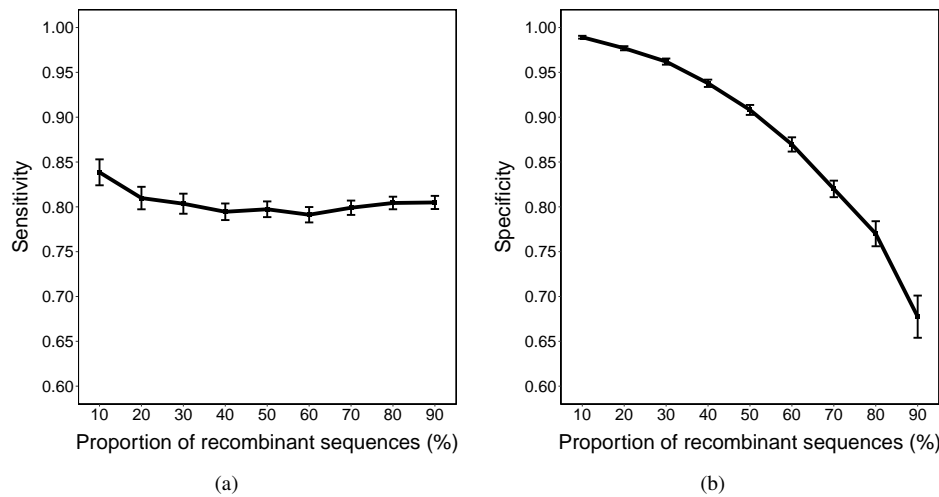

**Fig 7. Mean sensitivity and specificity (with 95% confidence intervals) for varying proportions of recombinant sequences.**

**Number of recombinations per recombinant** As shown in Fig 8, the datasets where there are more recombinations per recombinant sequence appear to have a higher sensitivity, and slightly lower specificity. As for recombinant proportion, an increase in the number of recombinations results (correctly) in more inferred recombinations; unlike that case, the number of true recombinants remains the same here. It appears that the ‘extra’ detections are mostly correct, which results in a greater proportion of true positives (sensitivity increases) and a relatively stable specificity.

383

384

385

386

387

388

389

We also conducted a further analysis by matching the distribution of the number of recombinations per recombinant to the Ghana dataset from Section “Analysis of DBL $\alpha$  sequences from a cross-sectional study in Ghana” (see S3 File and S4 Fig for more details). Our results indicate that, despite a low specificity (40.0%), a high sensitivity (89.0%) still demonstrates the applicability of our algorithm to real data.

390

391

392

393

394

**Dataset size** Dataset size does not appear to have a drastic effect on the sensitivity of the method, while specificity increases slightly (see Fig 9). It is to be expected that performance increases slightly as information accumulates across a larger dataset, but it is unclear why this is only expressed in the specificity here.

395

396

397

398

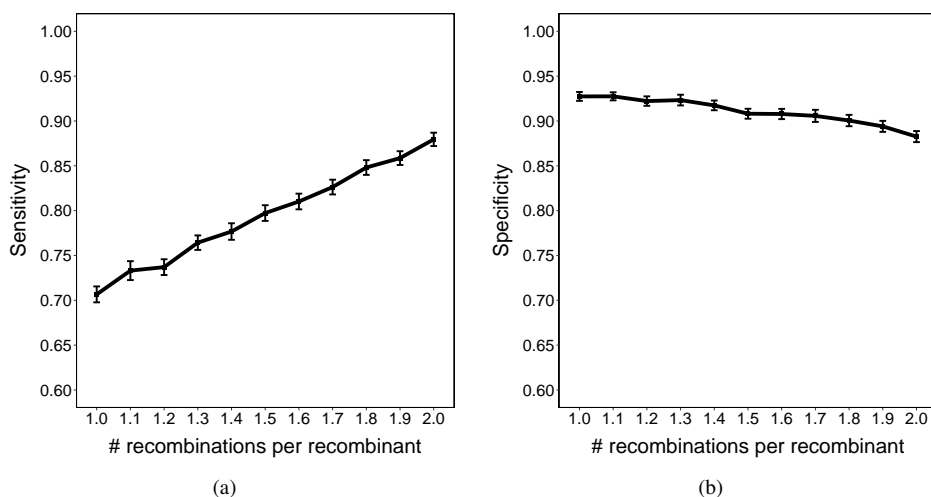

**Fig 8. Mean sensitivity and specificity (with 95% confidence intervals) for varying numbers of recombinations per recombinant sequence.**

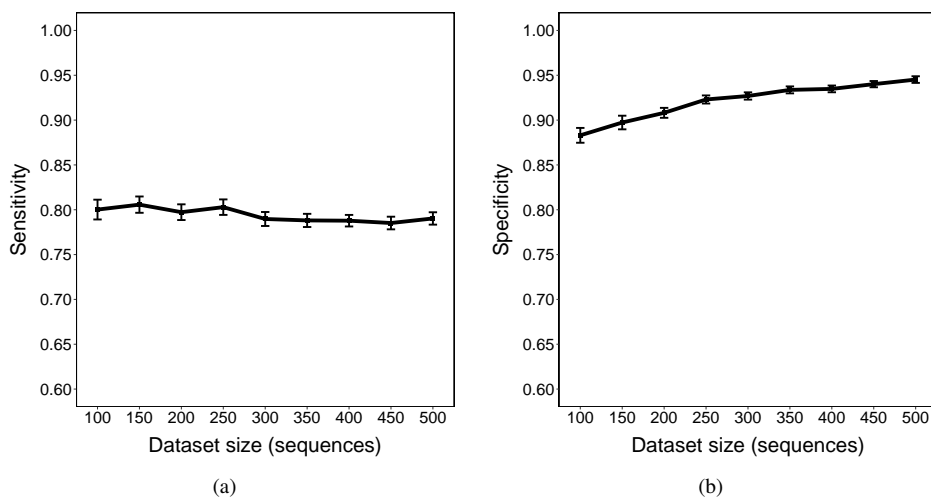

**Fig 9. Mean sensitivity and specificity (with 95% confidence intervals) for varying dataset size.**

**Sequence length** Datasets with longer sequence length have much higher sensitivity, and slightly lower specificity (Fig 10). It seems (S5 Fig) that as sequence length increases, the number of recombinations detected also increases, even though the true number of recombinations remains the same. This increase in detections, combined with a fixed percentage of recombinants, results in a effect similar to that seen for the “number of recombinations per recombinant”: an increase in sensitivity and a slightly decreasing specificity.

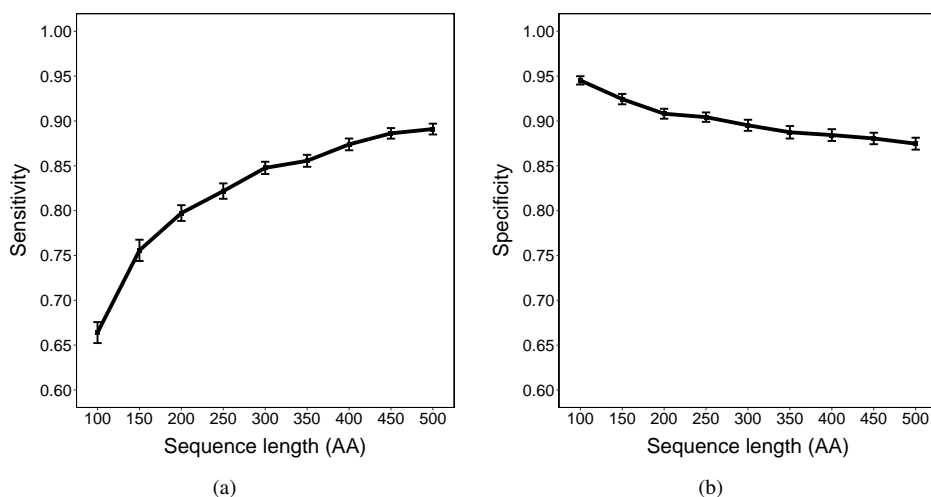

**Fig 10. Mean sensitivity and specificity (with 95% confidence intervals) for varying sequence length.**

**Mutation rate** As the mutation rate increases, the sensitivity of the method rapidly increases 405  
before levelling out (Fig 11). This makes sense, as if the number of substitutions is too low, the 406  
sequences are difficult to distinguish from each other, which makes the results from the JHMM 407  
unreliable. Conversely, as the number of substitutions grows, it also becomes more difficult to 408  
identify sequences which are closely related to each other, resulting in a decrease in specificity. 409

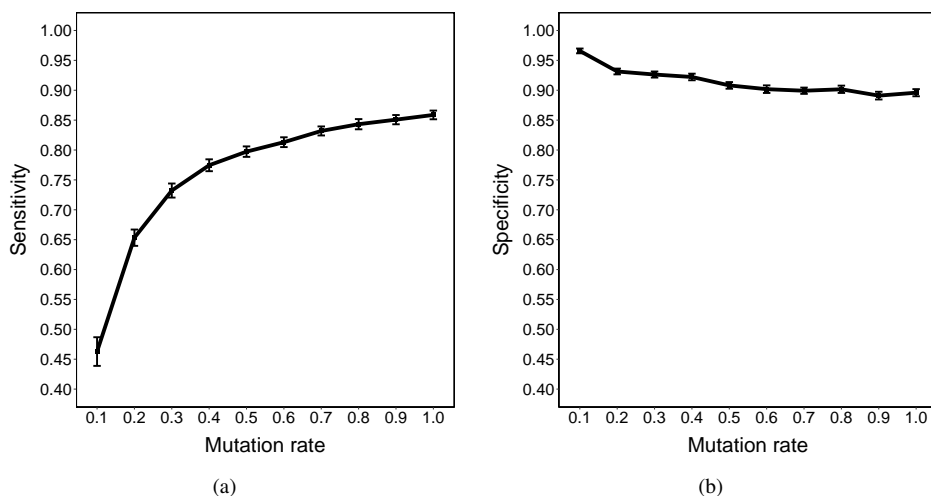

**Fig 11. Mean sensitivity and specificity (with 95% confidence intervals) for varying mutation rate.**

**Insertion/deletion parameters** An important feature of our method is its ability to accept 410  
unaligned sequences as input. When we include indels in the generating process, we can see 411

(Figs 12, 13) that both sensitivity and specificity remain relatively unaffected, with a moderate decline in specificity as indel rate increases. This indicates that our method is robust to indels even when the indel rate or fragment size is large. In these scenarios, existing methods which only accept aligned sequences would be unable to cope.

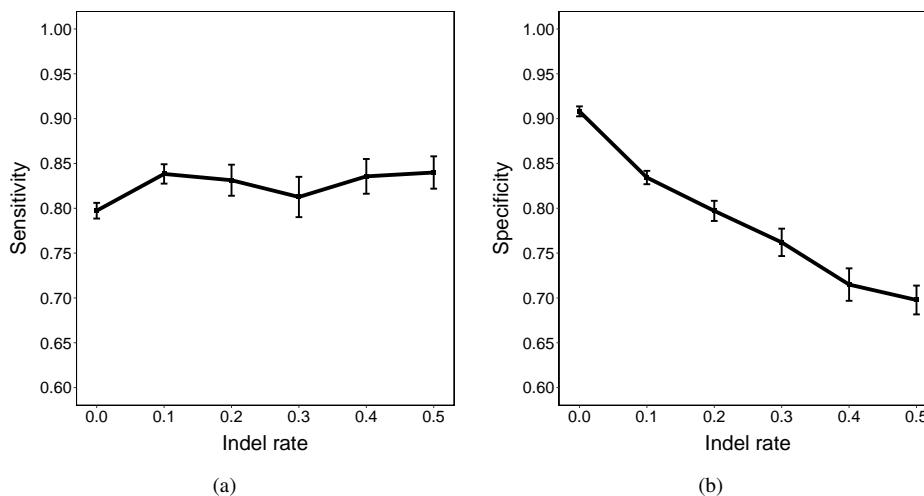

**Fig 12. Mean sensitivity and specificity (with 95% confidence intervals) for varying indel rate.**

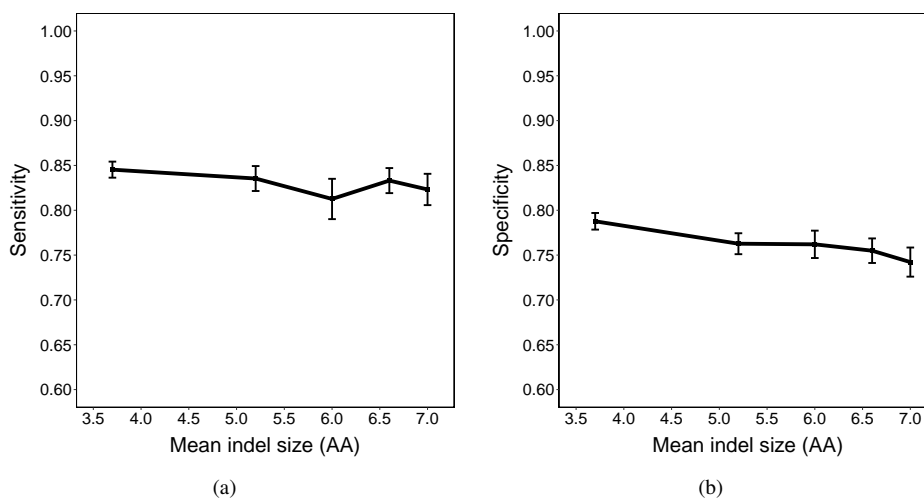

**Fig 13. Mean sensitivity and specificity (with 95% confidence intervals) for varying indel size.**

**Other parameters** The method appears to be robust to the stochastic model of amino acid evolution (Fig 14).

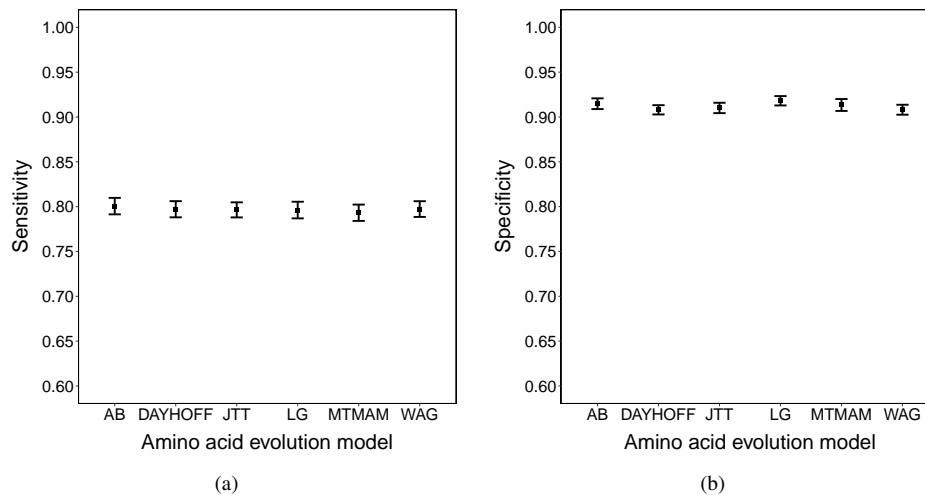

**Fig 14. Mean sensitivity/specificity (with 95% confidence intervals) for each model of amino acid evolution.**

### Support values

418

In addition to detecting recombinants, we also show above how to calculate support values for each detection using bootstrapping. Here, we verify that the calculated values are indeed effective for this purpose. For our simulations, we calculate the support values for each of the correct detections, as well as each of the false positives. The distributions of the support values for the default parameters are shown in Fig 15. Here, we can see that there is a clear separation between the distributions of support values for the true and false positives; while the values for both are relatively high, the support values for true detections are overall much higher. Similar patterns are seen among all the remaining parameter settings (S6 Fig–S13 Fig).

419

420

421

422

423

424

425

426

This suggests that we can use a threshold on the support value to refine our detections. This is reasonable if we wish to reduce false positives; however, in practice we found that applying a threshold also reduced true positives (as expected) to an extent which lowered the overall accuracy of the method, so we have elected not to apply it here. Instead, we suggest that the support value be used to assess the confidence which should be placed in individual recombinant detections of interest.

427

428

429

430

431

432

### Accuracy of the JHMM method

433

The JHMM method of [4] forms a key part of our method to detect recombinants. Until now, there has not been a systematic study of the accuracy of this method. Two key outputs of this

434

435



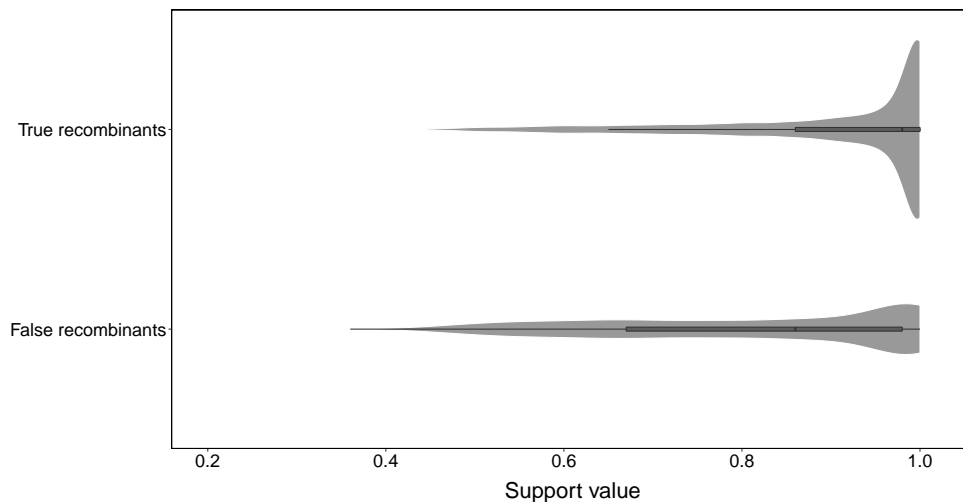

**Fig 15. Distributions of support values under default parameters without indel events.**

method are the locations of the inferred recombination breakpoints, and the estimated 436  
recombination parameter  $\rho$ . Here, we study the accuracy of these inferences for our simulated 437  
datasets. 438

**Recombination breakpoints** For each recombination, we calculate the distance between the 439  
true and inferred breakpoints. For ease of comparison, we restrict this analysis to the case where 440  
each recombinant sequence has exactly two parents (one recombination), which avoids the 441  
problems of matching breakpoints in the same sequence to each other. 442

We find in general (see Fig 16) that the breakpoints are very accurately inferred, with 38.4% 443  
of all breakpoints inferred exactly, and 75.0% being at most 5AA from the true value. There is 444  
also a slight but noticeable positive bias, where the inferred breakpoints tend to be slightly larger 445  
than the true breakpoints (S14 Fig). This can be best explained by noting that the JHMM method 446  
infers the best (Viterbi) path from left to right, and recombinations are considered relatively 447  
unlikely; hence a recombination will tend to be inferred slightly later than it actually is, 448  
particularly if both parents' sequences are identical around the breakpoint. 449

Finally, we note that the breakpoint accuracy appears to be very robust to indel events; this is 450  
expected, since the method explicitly accounts for these events. 451

**Recombination rate** The parameter  $\rho$  is directly related to the recombination rate in the 452  
dataset (although it does not provide a rate in terms of time dimension). As such, an accurate 453  
estimate of  $\rho$  is valuable for molecular phylogeneticists. We observe in our simulated datasets 454

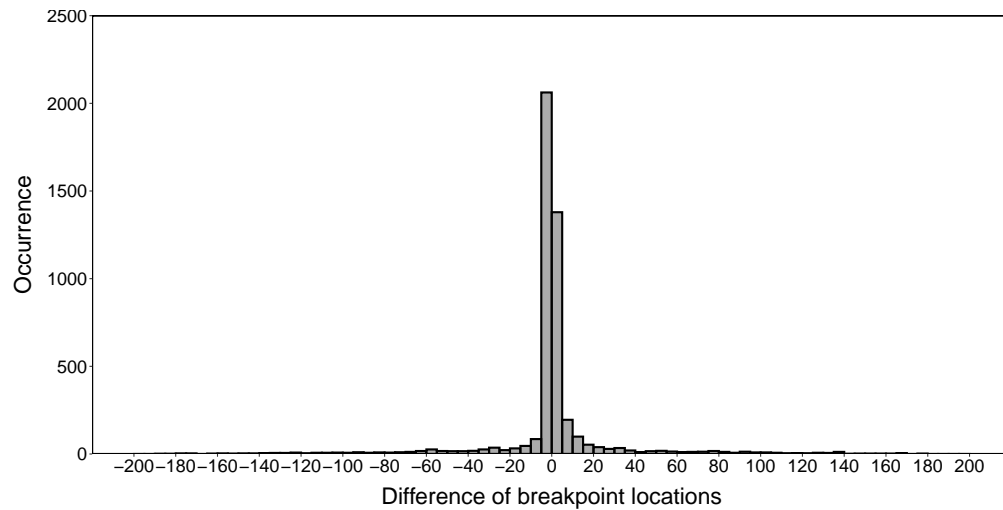

**Fig 16. Breakpoint inference error of the JHMM method under default simulation parameters.**

(S15 Fig-S18 Fig) that the inferred values of  $\rho$  provide an accurate estimate of the recombination rate. 455  
rate. 456

On the other hand, the inferred  $\rho$  can also be affected by mutation rate (Fig 17) and (to a 457  
lesser extent) indel events (S19 Fig-S20 Fig); here, an increasing rate of non-recombination 458  
events leads to some of them being mistaken for recombination, distorting the inference of the 459  
recombination rate. This indicates that the use of the JHMM to infer the true recombination rate 460  
has the potential to be inaccurate. 461

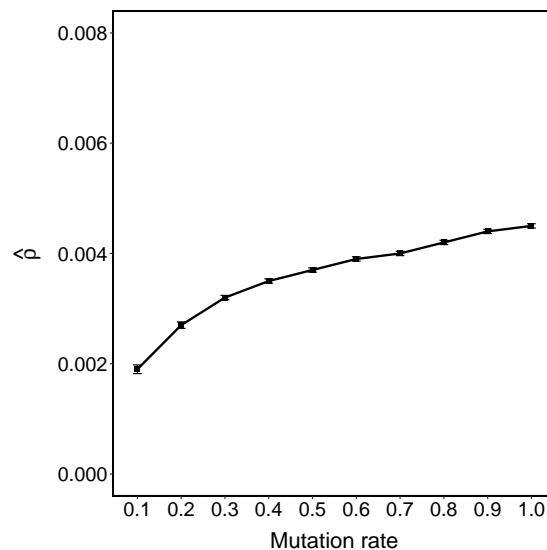

**Fig 17. Estimated  $\rho$  (and 95% CI) with varying mutation rate (but constant number of recombinations).**

## Discussion

In this paper, we have developed a statistical method to detect recombinant sequences from a large set of unaligned genetic sequences without a reference panel. We can also assess the reliability of the inferred recombinants with a bootstrapping-based tool. Comparisons between recombinant and non-recombinant DBL $\alpha$  types reveal a series of biologically meaningful results; for example, recombination is more frequent within ups types and DBL $\alpha$  subclasses, and non-recombinants are more conserved than recombinants. Simulations show that our method performs very well even when there is a high recombination rate, long sequences, or a large dataset. Crucially, it maintains its accuracy in the presence of insertions and deletions, where methods which require an alignment would normally fail.

We note that our method is set up to detect only recent recombinants; for example, if a more ancient recombination produces a sequence that diverges into two lineages, the lineages will be preferentially matched to each other by the JHMM, and it is possible that no recombination will be detected. Note that ‘recent’ in this context only means that the recombinant sequence has not yet diverged; it is uncertain what timescale this corresponds to. For example, although recombination events have been reported on epidemiologically relevant timescales of several years [10], a recombinant may continue to be ‘recent’ for far longer than that. The Ghana dataset studied in this paper is the first of a longitudinal dataset collected over several seasons, which may give insight into the frequency and patterns of recombination on epidemiological timescales; this is the subject of current work.

Furthermore, there is an implicit assumption that recombinations do not ‘interact’ with each other, i.e., that they are sufficiently far apart either in the evolutionary network or in the genome that we can decompose the dataset into recombinant triples and assess those independently. This is a strong (and perhaps unrealistic, in the context of genes which have a high recombination rate) assumption which we make in order to obtain a tractable algorithm. As seen from our results, we do appear to obtain good accuracy with our detections even in cases where this assumption might not hold; assessing the exact impact of this assumption on our results is also the subject of future work.

This algorithm opens up new avenues for further analysis of *var* genes. In particular, the detection of (recent) recombinants and their parents will aid in the construction of phylogenetic networks. The ability to infer such a network of *var* genes may have important implications for

monitoring, intervention, and diagnosis of malaria in the future. 493

Finally, although our methods are motivated primarily by the highly recombinant *var* genes, 494  
our approach is not restricted to these genes, but could be used for any genes which are 495  
recombinant but lack a reliable alignment or reference panel (e.g., detecting gene fusions in the 496  
context of RNA sequencing in human cancer bioinformatics). The scalability of our method 497  
means that it will be applicable even to large datasets, thus holding great promise for broader 498  
applications. 499

## Supporting information 500

**S1 File. Recombinant proportions across isolates and catchment areas.** 501

**S2 File. Detection of HBs in recombinant and non-recombinant DBL $\alpha$  types.** 502

**S3 File. Matching recombination numbers to real data** 503

**S1 Fig. Distribution of source segment length in mosaic representations of Ghana data.** 504

There is a peak of source segments which less than 5AA, which appear to be the artifacts of the 505  
JHMM method. 506

**S2 Fig. Proportions (and 95% confidence intervals) of recombinants for each isolate.** 507

The horizontal dashed line displays the overall proportion of recombinant sequences in the entire 508  
dataset. 509

**S3 Fig. Frequency of DBL $\alpha$  types in the isolates of the Ghana dataset.** 510

**S4 Fig. Distribution of source segment count from the JHMM output in the Ghana 511  
data.** 512

**S5 Fig. The number of recombinant triples detected by our algorithm for varying 513**

**sequence length.** The reference line indicates the true number of recombinant triples in the 514  
dataset. 515

|                                                                                                                                                                                                                                                  |                   |
|--------------------------------------------------------------------------------------------------------------------------------------------------------------------------------------------------------------------------------------------------|-------------------|
| <b>S6 Fig. Distribution of support values for varying proportions of recombinant sequences.</b>                                                                                                                                                  | 516               |
| Red points represent the median of support values (same hereinafter).                                                                                                                                                                            | 517               |
| <b>S7 Fig. Distribution of support values for varying numbers of recombinations per recombinant sequence.</b>                                                                                                                                    | 518               |
|                                                                                                                                                                                                                                                  | 519               |
| <b>S8 Fig. Distribution of support values for varying dataset size.</b>                                                                                                                                                                          | 520               |
| <b>S9 Fig. Distribution of support values for varying sequence length.</b>                                                                                                                                                                       | 521               |
| <b>S10 Fig. Distribution of support values for varying mutation rate.</b>                                                                                                                                                                        | 522               |
| <b>S11 Fig. Distribution of support values for different models of amino acid evolution.</b>                                                                                                                                                     | 523               |
| <b>S12 Fig. Distribution of support values for varying indel rate.</b>                                                                                                                                                                           | 524               |
| <b>S13 Fig. Distribution of support values for varying indel size.</b>                                                                                                                                                                           | 525               |
| <b>S14 Fig. Breakpoint inference of the JHMM method under default simulation parameters.</b>                                                                                                                                                     | 526               |
| Most points cluster around the line $y = x$ , indicating a high accuracy of breakpoint inference. However, this is a slight positive bias in the identified breakpoint location, particularly for breakpoints which occur later in the sequence. | 527<br>528<br>529 |
| <b>S15 Fig. Estimated <math>\rho</math> (and 95% CI) for varying proportions of recombinant sequences.</b>                                                                                                                                       | 530               |
| Some CIs are too short to be visible (similarly for S16 Fig-S18 Fig. $\hat{\rho}$ appears to grow linearly with the proportion of recombinant sequences, as expected.                                                                            | 531<br>532        |
| <b>S16 Fig. Estimated <math>\rho</math> (and 95% CI) for varying number of recombinations per recombinant sequence.</b>                                                                                                                          | 533               |
| $\hat{\rho}$ appears to grow linearly with the number of recombinants per sequence, as expected.                                                                                                                                                 | 534<br>535        |
| <b>S17 Fig. Estimated <math>\rho</math> (and 95% CI) for varying dataset size.</b>                                                                                                                                                               | 536               |
| $\hat{\rho}$ decreases slightly with increasing dataset size, although the recombination rate remains constant.                                                                                                                                  | 537               |

**S18 Fig. Estimated  $\rho$  (and 95% CI) for varying sequence length.**  $\hat{\rho}$  decreases in inverse 538  
proportion to the sequence length, as expected. 539

**S19 Fig. Estimated  $\rho$  (and 95% CI) for varying indel rate.** There is a moderate increase in 540  
 $\hat{\rho}$  as indel rate increases. This is unsurprising, as some of indel events are mistaken for 541  
recombinations, distorting the inference of the recombination rate. 542

**S20 Fig. Estimated  $\rho$  (and 95% CI) for varying indel size.** Indel size (but constant indel 543  
rate) does not appear to have a drastic effect on estimated  $\rho$ . 544

## Data accessibility 545

All sequence data used in this study is available at DDBJ/ENA/GenBank: BioProject Number 546  
PRJNA396962; Accession number SAMN08902792. All the source code of proposed algorithm 547  
with test data and manuals are available from Github repository 548  
([https://github.com/qianfeng2/detREC\\_program](https://github.com/qianfeng2/detREC_program)). 549

## Acknowledgments 550

We would like to thank Martine Zilversmit and Mun Hua Tan for informative discussions, and 551  
David Posada for kindly providing us the source code of the recombination detection program 552  
Chimaera. 553

This study was supported by the Fogarty International Center at the National Institutes of 554  
Health (Program on the Ecology and Evolution of Infectious Diseases), Grant number: 555  
R01-TW009670 to KPD. Salary support for KET was provided by R01-TW009670 and The 556  
University of Melbourne. SRP was supported by a Melbourne International Engagement Award 557  
from The University of Melbourne. Salary support for MFD was provided by The University of 558  
Melbourne. QF has been supported by the China Scholarship Council. The funders had no role 559  
in study design, data collection and analysis, decision to publish, or preparation of the 560  
manuscript. 561

## References

1. Weiller GF. Phylogenetic profiles: a graphical method for detecting genetic recombinations in homologous sequences. *Molecular Biology and Evolution*. 1998;15(3):326–335.
2. Jakobsen IB, Easteal S. A program for calculating and displaying compatibility matrices as an aid in determining reticulate evolution in molecular sequences. *Bioinformatics*. 1996;12(4):291–295.
3. Bruen TC, Philippe H, Bryant D. A simple and robust statistical test for detecting the presence of recombination. *Genetics*. 2006;172(4):2665–2681.
4. Zilversmit MM, Chase EK, Chen DS, Awadalla P, Day KP, McVean G. Hypervariable antigen genes in malaria have ancient roots. *BMC Evolutionary Biology*. 2013;13(1):110.
5. Drysdale CM, McGraw DW, Stack CB, Stephens JC, Judson RS, Nandabalan K, et al. Complex promoter and coding region  $\beta$ 2-adrenergic receptor haplotypes alter receptor expression and predict *in vivo* responsiveness. *Proceedings of the National Academy of Sciences*. 2000;97(19):10483–10488.
6. Li N, Stephens M. Modeling linkage disequilibrium and identifying recombination hotspots using single-nucleotide polymorphism data. *Genetics*. 2003;165(4):2213–2233.
7. Robertson DL, Hahn BH, Sharp PM. Recombination in AIDS viruses. *Journal of Molecular Evolution*. 1995;40(3):249–259.
8. Holmes EC, Worobey M, Rambaut A. Phylogenetic evidence for recombination in dengue virus. *Molecular Biology and Evolution*. 1999;16(3):405–409.
9. Gibbs MJ, Armstrong JS, Gibbs AJ. Recombination in the hemagglutinin gene of the 1918 "Spanish flu". *Science*. 2001;293(5536):1842–1845.
10. Claessens A, Hamilton WL, Kekre M, Otto TD, Faizullahoy A, Rayner JC, et al. Generation of antigenic diversity in *Plasmodium falciparum* by structured rearrangement of Var genes during mitosis. *PLoS Genetics*. 2014;10(12):e1004812.

11. Jiang H, Li N, Gopalan V, Zilversmit MM, Varma S, Nagarajan V, et al. High recombination rates and hotspots in a *Plasmodium falciparum* genetic cross. *Genome Biology*. 2011;12(4):R33.
12. Weatherly DB, Peng D, Tarleton RL. Recombination-driven generation of the largest pathogen repository of antigen variants in the protozoan *Trypanosoma cruzi*. *BMC Genomics*. 2016;17(1):729.
13. Posada D. Unveiling the molecular clock in the presence of recombination. *Molecular Biology and Evolution*. 2001;18(10):1976–1978.
14. Posada D, Crandall KA. The effect of recombination on the accuracy of phylogeny estimation. *Journal of Molecular Evolution*. 2002;54(3):396–402.
15. Kiil K, Østerlund M. CleanRecomb, a quick tool for recombination detection in SNP based cluster analysis. *bioRxiv*. 2018; p. 317131.
16. Huson DH, Rupp R, Scornavacca C. *Phylogenetic networks: concepts, algorithms and applications*. Cambridge University Press; 2010.
17. Posada D, Crandall KA. Evaluation of methods for detecting recombination from DNA sequences: computer simulations. *Proceedings of the National Academy of Sciences*. 2001;98(24):13757–13762.
18. Chan CX, Beiko RG, Ragan MA. A two-phase approach for detecting recombination in nucleotide sequences. *arXiv preprint arXiv:07091874*. 2007;.
19. Lemey P, Salemi M, Vandamme AM. *The phylogenetic handbook: a practical approach to phylogenetic analysis and hypothesis testing*. Cambridge University Press; 2009.
20. Haubold B, Krause L, Horn T, Pfaffelhuber P. An alignment-free test for recombination. *Bioinformatics*. 2013;29(24):3121–3127.
21. Siepel AC, Halpern AL, Macken C, Korber BT. A computer program designed to screen rapidly for HIV type 1 intersubtype recombinant sequences. *AIDS Research and Human Retroviruses*. 1995;11(11):1413–1416.
22. Huber T, Faulkner G, Hugenholtz P. Bellerophon: a program to detect chimeric sequences in multiple sequence alignments. *Bioinformatics*. 2004;20(14):2317–2319.



23. Etherington GJ, Dicks J, Roberts IN. Recombination Analysis Tool (RAT): a program for the high-throughput detection of recombination. *Bioinformatics*. 2005;21(3):278–281.
24. Buendia P, Narasimhan G. Sliding MinPD: building evolutionary networks of serial samples via an automated recombination detection approach. *Bioinformatics*. 2007;23(22):2993–3000.
25. Hein J. Reconstructing evolution of sequences subject to recombination using parsimony. *Mathematical Biosciences*. 1990;98(2):185–200.
26. Hein J. A heuristic method to reconstruct the history of sequences subject to recombination. *Journal of Molecular Evolution*. 1993;36(4):396–405.
27. Grassly NC, Holmes EC. A likelihood method for the detection of selection and recombination using nucleotide sequences. *Molecular Biology and Evolution*. 1997;14(3):239–247.
28. Martin D, Rybicki E. RDP: detection of recombination amongst aligned sequences. *Bioinformatics*. 2000;16(6):562–563.
29. Martin DP, Murrell B, Golden M, Khoosal A, Muhire B. RDP4: Detection and analysis of recombination patterns in virus genomes. *Virus Evolution*. 2015;1(1).
30. Martin DP, Murrell B, Khoosal A, Muhire B. Detecting and analyzing genetic recombination using RDP4. *Methods in Molecular Biology (Clifton, NJ)*. 2017;1525:433–460.
31. Sawyer S. Statistical tests for detecting gene conversion. *Molecular Biology and Evolution*. 1989;6(5):526–538.
32. Smith JM. Analyzing the mosaic structure of genes. *Journal of Molecular Evolution*. 1992;34(2):126–129.
33. Maynard Smith J, Smith NH. Detecting recombination from gene trees. *Molecular Biology and Evolution*. 1998;15(5):590–599.
34. Worobey M. A novel approach to detecting and measuring recombination: new insights into evolution in viruses, bacteria, and mitochondria. *Molecular Biology and Evolution*. 2001;18(8):1425–1434.

35. Schultz AK, Zhang M, Bulla I, Leitner T, Korber B, Morgenstern B, et al. jpHMM: improving the reliability of recombination prediction in HIV-1. *Nucleic Acids Research*. 2009;37(suppl\_2):W647–W651.
36. Rorick MM, Rask TS, Baskerville EB, Day KP, Pascual M. Homology blocks of *Plasmodium falciparum* var genes and clinically distinct forms of severe malaria in a local population. *BMC Microbiology*. 2013;13(1):244.
37. Scherf A, Hernandez-Rivas R, Buffet P, Bottius E, Benatar C, Pouvelle B, et al. Antigenic variation in malaria: in situ switching, relaxed and mutually exclusive transcription of var genes during intra-erythrocytic development in *Plasmodium falciparum*. *The EMBO Journal*. 1998;17(18):5418–5426.
38. Dzikowski R, Frank M, Deitsch K. Mutually exclusive expression of virulence genes by malaria parasites is regulated independently of antigen production. *PLoS Pathogens*. 2006;2(3).
39. Gardner MJ, Hall N, Fung E, White O, Berriman M, Hyman RW, et al. Genome sequence of the human malaria parasite *Plasmodium falciparum*. *Nature*. 2002;419(6906):498.
40. Barry AE, Leliwa-Sytek A, Tavul L, Imrie H, Migot-Nabias F, Brown SM, et al. Population genomics of the immune evasion (var) genes of *Plasmodium falciparum*. *PLoS Pathogens*. 2007;3(3):e34.
41. Rask TS, Hansen DA, Theander TG, Pedersen AG, Lavstsen T. *Plasmodium falciparum* erythrocyte membrane protein 1 diversity in seven genomes—divide and conquer. *PLoS Computational Biology*. 2010;6(9):e1000933.
42. Chen DS, Barry AE, Leliwa-Sytek A, Smith TA, Peterson I, Brown SM, et al. A molecular epidemiological study of var gene diversity to characterize the reservoir of *Plasmodium falciparum* in humans in Africa. *PLoS One*. 2011;6(2):e16629.
43. Ruybal-Pesántez S, Tiedje KE, Tonkin-Hill G, Rask TS, Kanya MR, Greenhouse B, et al. Population genomics of virulence genes of *Plasmodium falciparum* in clinical isolates from Uganda. *Scientific Reports*. 2017;7(1):11810.
44. Day KP, Artzy-Randrup Y, Tiedje KE, Rougeron V, Chen DS, Rask TS, et al. Evidence of strain structure in *Plasmodium falciparum* var gene repertoires in children from Gabon,

- West Africa. Proceedings of the National Academy of Sciences. 2017;114(20):E4103–E4111.
45. Bull PC, Buckee CO, Kyes S, Kortok MM, Thathy V, Guyah B, et al. *Plasmodium falciparum* antigenic variation. Mapping mosaic var gene sequences onto a network of shared, highly polymorphic sequence blocks. Molecular Microbiology. 2008;68(6):1519–1534.
  46. Tessema SK, Nakajima R, Jasinskas A, Monk SL, Lekieffre L, Lin E, et al. Protective immunity against severe malaria in children is associated with a limited repertoire of antibodies to conserved PfEMP1 variants. Cell Host & Microbe. 2019;26(5):579–590.
  47. Sherman I. Reflections on a century of malaria biochemistry. vol. 67. Academic Press; 2011.
  48. Tonkin-Hill G, Ruybal-Pesántez S, Tiedje KE, Rougeron V, Zakeri S, Pumpaibool T, et al. Global structure of the var genes encoding the major variant surface antigen of *Plasmodium falciparum*. PLoS Genetics. 2020. Forthcoming.
  49. Katoh K, Frith MC. Adding unaligned sequences into an existing alignment using MAFFT and LAST. Bioinformatics. 2012;28(23):3144–3146.
  50. Rabiner LR. A tutorial on hidden Markov models and selected applications in speech recognition. Proceedings of the IEEE. 1989;77(2):257–286.
  51. Rodríguez LJ, Torres I. Comparative study of the baum-welch and viterbi training algorithms applied to read and spontaneous speech recognition. In: Iberian Conference on Pattern Recognition and Image Analysis. Springer; 2003. p. 847–857.
  52. Pardi F, Scornavacca C. Reconstructible phylogenetic networks: do not distinguish the indistinguishable. PLoS Computational Biology. 2015;11(4).
  53. Boni MF, Posada D, Feldman MW. An exact nonparametric method for inferring mosaic structure in sequence triplets. Genetics. 2007;176(2):1035–1047.
  54. Henikoff S, Henikoff JG. Amino acid substitution matrices from protein blocks. Proceedings of the National Academy of Sciences. 1992;89(22):10915–10919.

55. Henikoff S, Henikoff JG. Performance evaluation of amino acid substitution matrices. *Proteins: Structure, Function, and Bioinformatics*. 1993;17(1):49–61.
56. Felsenstein J. Confidence limits on phylogenies: an approach using the bootstrap. *Evolution*. 1985;39(4):783–791.
57. He Q, Pilosof S, Tiedje KE, Ruybal-Pesántez S, Artzy-Randrup Y, Baskerville EB, et al. Networks of genetic similarity reveal non-neutral processes shape strain structure in *Plasmodium falciparum*. *Nature Communications*. 2018;9(1):1–12.
58. Pilosof S, He Q, Tiedje KE, Ruybal-Pesántez S, Day KP, Pascual M. Competition for hosts modulates vast antigenic diversity to generate persistent strain structure in *Plasmodium falciparum*. *PLoS Biology*. 2019;17(6):e3000336.
59. Tiedje KE, Oduro AR, Agongo G, Anyorigiya T, Azongo D, Awine T, et al. Seasonal variation in the epidemiology of asymptomatic *Plasmodium falciparum* infections across two catchment areas in Bongo District, Ghana. *The American Journal of Tropical Medicine and Hygiene*. 2017;97(1):199–212.
60. Ruybal-Pesántez S, Tiedje KE, Rorick MM, Amenga-Etego L, Ghansah A, Oduro AR, et al. Lack of geospatial population structure yet significant linkage disequilibrium in the reservoir of *Plasmodium falciparum* in Bongo District, Ghana. *The American Journal of Tropical Medicine and Hygiene*. 2017;97(4):1180–1189.
61. Rorick MM, Artzy-Randrup Y, Ruybal-Pesántez S, Tiedje KE, Rask TS, Oduro A, et al. Signatures of competition and strain structure within the major blood-stage antigen of *Plasmodium falciparum* in a local community in Ghana. *Ecology and evolution*. 2018;8(7):3574–3588.
62. Edgar RC. Search and clustering orders of magnitude faster than BLAST. *Bioinformatics*. 2010;26(19):2460–2461.
63. Kaestli M, Cockburn IA, Cortés A, Baea K, Rowe JA, Beck HP. Virulence of malaria is associated with differential expression of *Plasmodium falciparum* var gene subgroups in a case-control study. *The Journal of Infectious Diseases*. 2006;193(11):1567–1574.

64. Kraemer SM, Kyes SA, Aggarwal G, Springer AL, Nelson SO, Christodoulou Z, et al. Patterns of gene recombination shape var gene repertoires in *Plasmodium falciparum*: comparisons of geographically diverse isolates. *BMC Genomics*. 2007;8(1):45.
65. Camacho C, Coulouris G, Avagyan V, Ma N, Papadopoulos J, Bealer K, et al. BLAST+: architecture and applications. *BMC Bioinformatics*. 2009;10(1):421.
66. Rougeron V, Tiedje KE, Chen DS, Rask TS, Gamboa D, Maestre A, et al. Evolutionary structure of *Plasmodium falciparum* major variant surface antigen genes in South America: Implications for epidemic transmission and surveillance. *Ecology and Evolution*. 2017;7(22):9376–9390.
67. Freitas-Junior LH, Bottius E, Pirrit LA, Deitsch KW, Scheidig C, Guinet F, et al. Frequent ectopic recombination of virulence factor genes in telomeric chromosome clusters of *P. falciparum*. *Nature*. 2000;407(6807):1018–1022.
68. Taylor HM, Kyes SA, Newbold CI, et al. Var gene diversity in *Plasmodium falciparum* is generated by frequent recombination events. *Molecular and Biochemical Parasitology*. 2000;110(2):391–397.
69. Sander AF, Lavstsen T, Rask TS, Lisby M, Salanti A, Fordyce SL, et al. DNA secondary structures are associated with recombination in major *Plasmodium falciparum* variable surface antigen gene families. *Nucleic Acids Research*. 2013;42(4):2270–2281. doi:10.1093/nar/gkt1174.
70. Kelleher J, Etheridge AM, McVean G. Efficient coalescent simulation and genealogical analysis for large sample sizes. *PLoS Computational Biology*. 2016;12(5):e1004842.
71. Spielman SJ, Wilke CO. Pyvolve: a flexible Python module for simulating sequences along phylogenies. *PLoS One*. 2015;10(9):e0139047.
72. Fletcher W, Yang Z. INDELible: a flexible simulator of biological sequence evolution. *Molecular Biology and Evolution*. 2009;26(8):1879–1888.
73. Mirsky A, Kazandjian L, Anisimova M. Antibody-specific model of amino acid substitution for immunological inferences from alignments of antibody sequences. *Molecular Biology and Evolution*. 2015;32(3):806–819.

74. Dayhoff M, Schwartz R, Orcutt B. Chapter 22: A model of evolutionary change in proteins. In: Atlas of Protein Sequence and Structure. vol. 5. National Biomedical Research Foundation Silver Spring MD; 1978. p. 345–352.
75. Jones D, Taylor W, Thornton J. A mutation data matrix for transmembrane proteins. FEBS Letters. 1994;339(3):269–275.
76. Le SQ, Gascuel O. An improved general amino acid replacement matrix. Molecular Biology and Evolution. 2008;25(7):1307–1320.
77. Yang Z, Nielsen R, Hasegawa M. Models of amino acid substitution and applications to mitochondrial protein evolution. Molecular Biology and Evolution. 1998;15(12):1600–1611.
78. Kingman JF. On the genealogy of large populations. Journal of Applied Probability. 1982;19(A):27–43.
